# Supplementary material for: Mycotoxins-Imprinted Polymers: A State-of-the-Art Review
Source: MDPI journal article supplement (doi:10.3390/toxins16010047), 2024-01-15
Supplement: s1 [file s1]

# Supplementary Materials: Mycotoxins-Imprinted Polymers: A State-of-the-Art Review

**Table S1.** SPE of mycotoxins on commercial MIP cartridges.

| Mycotoxin    | Sample                  | Analytical method <sup>1</sup> | LOD <sup>2</sup> | LOQ <sup>2</sup> | % Recovery   | Ref. |
|--------------|-------------------------|--------------------------------|------------------|------------------|--------------|------|
| Fumonisin    | wheat, maize            | HPLC-MS                        | -                | 25               | 95 - 100     | [70] |
|              | ginger                  | HPLC-MS                        | 0.09             | 0.30             | 87.6 - 94.5  | [71] |
|              | beer, grape, red wine   | HPLC-FL                        | 0.025            | 0.08             | 91.6 - 101.7 | [72] |
| Ochratoxin A | wine                    |                                | 0.14             | 0.48             | 70.3 - 80.4  |      |
|              | beer                    | HPLC-MS                        | 0.29             | 0.97             | 63 - 76      | [73] |
|              | coffee                  |                                | 0.08             | 0.29             | 89.2 - 84.8  |      |
|              | chili                   |                                | 1.77             | 5.93             | 81.0 - 83.8  |      |
|              | cocoa                   | HPLC-FL                        | 0.62             | 1.25             | 86.5         | [74] |
| Patulin      | apple juice, puree, jam | HPLC-UV                        | 0.6              | -                | 77 - 96      | [75] |
|              | wheat, maize            | HPLC-FL                        | -                | -                | 82 - 90      | [76] |
| Zearalenone  | vegetable oils          | HPLC-FL                        | 1.2              | 4                | > 72         | [75] |
|              | beer                    | HPLC-FL                        | 1.5              | -                | 99 - 100.1   | [76] |

<sup>1</sup> HPLC-FL: fluorescence detection; HPLC-MS: mass spectrometric detection; HPLC-UV: ultraviolet detection. <sup>2</sup> ng/g or ng/mL

**Table S2.** SPE of mycotoxins on home-made MIP cartridges.

| Mycotoxin   | Template                       | Polymer                                         | Sample                               | Analyte        | Analytical method <sup>1</sup> | LOD <sup>2</sup> | LOQ <sup>2</sup> | % Recovery   | Ref. |
|-------------|--------------------------------|-------------------------------------------------|--------------------------------------|----------------|--------------------------------|------------------|------------------|--------------|------|
| Aflatoxins  | 5,7-dimethoxycoumarin          | surface imprinting on inverse photonic crystals | soy sauce, vinegar                   | B1             | HPLC-FL                        | 0.4              | -                | 73 -92       | [53] |
|             | 7-acetoxy-3-methylcoumarin     | surface imprinting on FDU-12 silica             | wheat, rice, corn, peanut, soybean   | B1, B2, G1, G2 | HPLC-FL                        | -                | 0.15 - 0.2       | 82.6 - 116.7 | [54] |
|             | 6-phenyl-4-methyl-2-chromanone | surface imprinting on SBA-15 silica             | peanuts                              | B1             | HPLC-FL                        | 0.118            | 0.393            | 79.5 - 91.2  | [58] |
|             | hydroxy-2-naphthoic acid       | bulk                                            | medicinal herbs, spices              | B1, B2, G1, G2 | HPLC-MS                        | 0.005 - 0.027    | 0.02 - 0.09      | 60 - 90      | [59] |
|             | B1                             | miniemulsion                                    | barley, beer, peanuts, peanut oil    | B1, M1         | HPLC-FL                        | -                | 0.05 - 0.16      | 83 - 96      | [82] |
|             | quercetin                      | surface imprinting on MOF UiO-66                | corn, rice, soybeans, wheat          | B1, B2, G1, G2 | HPLC-FL                        | 0.09 - 0.13      | -                | 74.3 - 98.6  | [84] |
|             | 5,7-dimethoxycoumarin          | surface imprinting on quantum dots              | corn, peanuts, rice, wheat           | B1, B2, G1, G2 | HPLC-FL                        | 0.03 - 0.05      | 0.1 - 0.2        | 98.9 - 119.7 | [85] |
| Alternariol | B1, B2, G1, G2 (mixture)       | bulk in cryogel                                 | figs, hazelnuts, peanuts, red pepper | B1, B2, G1, G2 | HPLC-FL                        | -                | 0.025            | -            | [93] |
|             | THDP                           | bulk                                            | tomato                               | ALT            | HPLC-FL                        | -                | -                | 81 - 103     | [36] |
|             | THDP                           | bulk                                            | tomato juice, sesame oil             | ALT, AME       | HPLC-MS                        | -                | 1.1 - 2.8        | 92.5 - 106.2 | [37] |
|             | THDP (mixed with CHDB)         | bulk in sacrificial silica beads                | maize, sunflower and olive oils      | ALT            | HPLC-FL                        | -                | 2                | 92 - 113     | [94] |
| Citrinin    | 2-DHNA                         | bulk                                            | rice                                 | CIT            | HPLC-UV                        | 0.5              | 1.5              | 85.9 - 98.8  | [34] |
|             | 2-DHNA                         | bulk                                            | maize                                | CIT            | HPLC-FL                        | 10               | 30               | 82.3 - 91.5  | [35] |
|             | CIT                            | precipitation                                   | rye                                  | CIT            | HPLC-UV                        | 0.35             | -                | 98 - 100.0   | [83] |

|              |                                     |                                            |                                               |                    |         |                        |              |              |      |
|--------------|-------------------------------------|--------------------------------------------|-----------------------------------------------|--------------------|---------|------------------------|--------------|--------------|------|
| Fumonisin    | FB1                                 | bulk                                       | bell pepper, corn flakes, rice                | FB1, FB2, FB3      | HPLC-MS | 4.5 - 22               | 9 - 44       | 62 - 83      | [91] |
| Ochratoxin A | CHNA-Phe                            | surface imprinting on MOF MIL-53           | soybeans                                      | OTA                | HPLC-FL | 0.04                   | 0.12         | 79 - 106     | [86] |
|              | CHNA-Phe                            | bulk                                       | red wine                                      | OTA                | HPLC-FL | 0.01                   | 0.033        | > 90         | [95] |
|              | CHNA-Phe                            | bulk                                       | red wine                                      | OTA                | HPLC-FL | 0.075                  | 0.225        | 88 - 102     | [96] |
| Patulin      | 2-hydroxynicotinic acid             | bulk                                       | apple juice                                   | PAT                | HPLC-UV | 10                     | 33.3         | 60 - 66      | [39] |
|              | oxyindole + 2-hydroxynicotinic acid | bulk                                       | apple juice, apple, hawtorn, red wine, tomato | PAT                | HPLC-MS | 0.05 - 0.2             | 0.2 - 0.5    | 81.3 - 106.3 | [41] |
|              | 2oxindole                           | bulk                                       | apple juice                                   | PAT                | HPLC-UV | 5                      | 16           | 84.3 - 88.9  | [42] |
|              | oxindole                            | surface imprinting on silica beads         | apple juice                                   | PAT                | HPLC-UV | 10                     | 40           | 90.1 - 96.5  | [87] |
|              | PAT                                 | ormosil                                    | apple juice                                   | PAT                | HPLC-UV | 8.6                    | 28.6         | 82 - 98      | [97] |
| T2-toxin     | T-2                                 | bulk                                       | maize, barley, oat                            | T-2                | HPLC-MS | 0.4 - 0.6              | 1.4 - 1.9    | 60 - 73      | [92] |
| Zearalenone  | CHDB                                | bulk                                       | barley, corn, rice, rye, wheat                | ZAN, $\alpha$ -ZOL | HPLC-FL | 1.7 - 2.4<br>0.7 - 1.3 | -            | 85 - 97      | [29] |
|              | CHDB                                | surface imprinting in halloysite nanotubes | oats, wheat                                   | ZEN                | HPLC-FL | 0.5 - 1.67             | -            | 77.1 - 102.4 | [88] |
|              | CHDB                                | surface imprinting on MOF MIL-101          | corn, rice, wheat                             | ZEN                | HPLC-FL | 2.09 - 4.16            | 6.25 - 12.50 | 81.7 - 90.1  | [89] |
|              | CHDB                                | surface imprinting on hydroxyapatite       | corn                                          | ZEN                | HPLC-FL | 1.32                   | 4.38         | 70.1 - 101.9 | [90] |
|              | CHDB (mixed with THDP)              | bulk in sacrificial silica beads           | maize, sunflower and olive oils               | ZEN                | HPLC-FL | -                      | 2            | 92 - 113     | [94] |

<sup>1</sup> HPLC-FL: fluorescence detection; HPLC-MS: mass spectrometric detection; HPLC-UV: ultraviolet detection. <sup>2</sup> ng/g or ng/mL

**Table S3.** on-line SPE of mycotoxins.

| <b>Mycotoxin</b> | <b>Template</b> | <b>Polymer</b>                          | <b>Sample</b>          | <b>Analyte</b> | <b>Analytical method <sup>1</sup></b> | <b>LOD <sup>2</sup></b> | <b>LOQ <sup>2</sup></b> | <b>% Recovery</b> | <b>Ref.</b> |
|------------------|-----------------|-----------------------------------------|------------------------|----------------|---------------------------------------|-------------------------|-------------------------|-------------------|-------------|
| Citrinin         | 2-DHNA          | bulk, packed in microcolumn             | red yeast rice extract | CIT            | HPLC-FL                               | 7.5                     | 25                      | 76 - 91           | [107]       |
| Ochratoxin A     | OTA             | polypyrrole, grafted on stainless steel | red wine               | OTA, OTB       | HPLC-FL                               | 0.05                    | -                       | 34 - 45           | [100]       |
|                  | OTA             | polypyrrole, grafted on stainless steel | red wine               | OTA            | HPLC-FL                               | 0.012                   | 0.041                   | -                 | [101]       |
|                  | OTA             | polypyrrole, grafted on stainless steel | red wine               | OTA            | HPLC-FL                               | 0.08                    | -                       | -                 | [102]       |
|                  | OTA             | monolith, in silica capillary           | beer                   | OTA            | HPLC-FL                               | 0.07                    | 0.2                     | 82.8              | [103]       |
|                  | OTA             | monolith, in microcolumn                | beer                   | OTA            | HPLC-FL                               | 0.05                    | -                       | 85.9              | [104]       |
|                  | OTA             | bulk, packed in microcolumn             | wheat extract          | OTA            | fluorescence                          | 1.2                     | -                       | 93.9              | [105]       |
| Patulin          | CHNA-Phe        | bulk packed in microcolumn              | wheat extract          | OTA            | HPLC-FL                               | 0.04                    | 0.12                    | 79.0 - 106        | [106]       |
|                  | not disclosed   | commercial polymer, in silica capillary | apple juice, cider     | PAT            | CZE-MS                                | 0.3                     | 1                       | 94 - 98           | [108]       |
|                  | not disclosed   | commercial polymer, in microcolumn      | apple juice            | PAT            | HPLC-UV                               | 15                      | 50                      | 81.2 - 109.9      | [99]        |

<sup>1</sup> HPLC-FL: fluorescence detection; HPLC-MS: mass spectrometric detection; HPLC-UV: ultraviolet detection; CZE-MS: capillary zonal electrophoresis – mass spectrometry. <sup>2</sup> ng/g or ng/mL

**Table S4.** DSPME of mycotoxins.

| Mycotoxin        | Template              | Polymer              | Sample                                                                                    | Analyte          | Analytical method <sup>1</sup> | LOD <sup>2</sup>                                 | LOQ <sup>2</sup>                                 | % Recovery   | Ref.  |
|------------------|-----------------------|----------------------|-------------------------------------------------------------------------------------------|------------------|--------------------------------|--------------------------------------------------|--------------------------------------------------|--------------|-------|
| Aflatoxins       | 5,7-dimethoxycoumarin | bulk                 | seed-derived beverages                                                                    | B1, B2           | HPLC-MS                        | 0.085 - 0.207                                    | -                                                | 91 - 104     | [52]  |
|                  | 7-ethoxycoumarin      | bulk                 | peanuts                                                                                   | B1               | SERS                           | 0.1                                              | -                                                | 93 - 102     | [55]  |
|                  | 5,7-dimethoxycoumarin | bulk                 | fish                                                                                      | B1,B2, G1,G2, M1 | HPLC-MS                        | B1: 0.11, B2: 0.20, G1: 0.12, G2: 0.20, M1: 0.10 | B1: 0.37, B2: 0.67, G1: 0.40, G2: 0.68, M1: 0.32 | 80 - 100     | [111] |
|                  | 7-methoxycoumarin     | precipitation        | cereal grains, dry nuts, spices, oil seeds, vegetables, mushrooms, pulses, milk and bread | B1, B2, G1, G2,  | HPLC-FL                        | B1: 0.193, B2: 0.087 G1: 0.208, G2: 0.059        | B1: 0.644, B2: 0.292, G1: 0.694, G2: 0.197       | 79.1 - 109.4 | [112] |
|                  | 5,7-dimethoxycoumarin | bulk in nanoscaffold | rice, maize, soybean                                                                      | B1               | HPLC-FL                        | 4.4                                              | 14.6                                             | 81.2 - 95.1  | [113] |
| Ochratoxin A     | not disclosed         | bulk (commercial)    | coffee, grape juice                                                                       | OTA              | HPLC-FL                        | 0.06, 0.02                                       | 0.19, 0.06                                       | 90.6 - 101.5 | [114] |
| Sterigmatocystin | crysazyn              | bulk in nanoscaffold | rice, maize, soybean                                                                      | STE              | HPLC-FL                        | 6.7                                              | 23                                               | 81.2 - 95.1  | [113] |

<sup>1</sup> HPLC-FL: fluorescence detection; HPLC-MS: mass spectrometric detection; HPLC-UV: ultraviolet detection; CZE-MS: capillary zonal electrophoresis – mass spectrometry. <sup>2</sup> ng/g or ng/mL

**Table S5.** MSPE / SBSE of mycotoxins.

| <b>Mycotoxin</b> | <b>Template</b>                     | <b>Polymer</b>                                 | <b>Sample</b>                        | <b>Analyte</b>                         | <b>Analytical method <sup>1</sup></b> | <b>LOD <sup>2</sup></b> | <b>LOQ <sup>2</sup></b> | <b>% Recovery</b>  | <b>Ref.</b> |
|------------------|-------------------------------------|------------------------------------------------|--------------------------------------|----------------------------------------|---------------------------------------|-------------------------|-------------------------|--------------------|-------------|
| Aflatoxins       | 5,7-dimethoxycoumarin               | stir bar composite                             | cereals, milk powder (M1)            | B1, B2, G1, G2, M1                     | HPLC-MS                               | 0.9, 0.7, 1.0, 1.7, 0.3 | 3.0, 2.3, 3.5, 5.8, 1.0 | 43, 40, 44, 39, 60 | [50]        |
|                  | ethylcoumarin-3-carboxyate          | grafting on Co <sub>3</sub> O <sub>4</sub>     | corn                                 | B1 B2 G2                               | HPLC-MS                               | 0.07 - 0.05             | 0.15 - 0.22             | 75.1 - 99.4        | [56]        |
|                  | 5,7-dimethoxycoumarin               | polydopamine on Fe <sub>3</sub> O <sub>4</sub> | corn, peanut oil                     | B1, B2                                 | HPLC-FL                               | 0.0004 - 0.024          | -                       | 89.0 - 105.0       | [117]       |
|                  | B1                                  | grafting on Fe <sub>3</sub> O <sub>4</sub> @Au | barley, beer                         | B1                                     | UV-Vis                                | 6.12                    | 18.6                    | 94.5 - 97.3        | [118]       |
|                  | B1                                  | grafting on Fe <sub>3</sub> O <sub>4</sub>     | liver                                | B1                                     | HPLC-FL                               | 0.05                    | -                       | 78 - 83            | [119]       |
| Fusarotoxins     | DON                                 | grafting on Fe <sub>3</sub> O <sub>4</sub>     | rice                                 | DON, 3-ADON, 15-ADON, FUS-X, T-2, HT-2 | HPLC-MS                               | 0.005 - 0.001           | 0.02 - 0.03             | 89.2 - 103.1       | [120]       |
| Ochratoxin A     | OTA                                 | grafting on Fe <sub>3</sub> O <sub>4</sub>     | rice, wine                           | OTA, OTB, OTC                          | HPLC-FL                               | 0.0018, 0.018, 0.0032   | -                       | 71.0 - 88.5        | [121]       |
| Patulin          | oxindole                            | stir bar composite                             | apple                                | PAT                                    | HPLC-MS                               | 10                      | 50                      | 60 - 70            | [43]        |
|                  | oxindole                            | ormosil on Fe <sub>3</sub> O <sub>4</sub>      | apple, grape, orange and pear juices | PAT                                    | HPLC-MS                               | 3                       | 10                      | 86.4 - 95.5        | [44]        |
|                  | oxyindole + 2-hydroxynicotinic acid | polydopamine on Fe <sub>3</sub> O <sub>4</sub> | apple, grape, and orange juices      | PAT                                    | HPLC-MS                               | 0.1                     | -                       | 79.4 - 97.9        | [122]       |
| Sterigmatocystin | crysazyn                            | grafting on Fe <sub>3</sub> O <sub>4</sub>     | wheat                                | STE                                    | HPLC-UV                               | 0.63                    | 1.4 - 1.9               | 87.6 - 96.9        | [123]       |

|             |            |                                                             |                                      |     |         |       |      |              |       |
|-------------|------------|-------------------------------------------------------------|--------------------------------------|-----|---------|-------|------|--------------|-------|
| Zearalenone | quercetin  | grafting on Fe <sub>3</sub> O <sub>4</sub>                  | buckwheat, maize, rice, wheat        | ZEN | HPLC-MS | 0.044 | 0.14 | 81 - 98      | [32]  |
|             | warfarin   | ormosil on Fe <sub>3</sub> O <sub>4</sub>                   | corn, flour, rice,                   | ZEN | HPLC-FL | 0.4   | 0.9  | 90.6 - 100   | [124] |
|             | warfarin   | ormosil on Fe <sub>3</sub> O <sub>4</sub>                   | corn, rice, wheat                    | ZEN | HPLC-FL | 0.1   | 0.3  | 96.3 - 98.8  | [125] |
|             | naringenin | grafting on hydroxyapatite - Fe <sub>3</sub> O <sub>4</sub> | <i>coix lachryma</i> , corn, millet, | ZEN | HPLC-FL | 2     | 6.65 | 62.0 - 95.2  | [126] |
|             | quercetin  | polydopamine on Fe <sub>3</sub> O <sub>4</sub>              | corn oil                             | ZEN | HPLC-FL | 0.68  | -    | 93.8 - 101.0 | [127] |
|             | warfarin   | grafting on halloysite - Fe <sub>3</sub> O <sub>4</sub>     | maize                                | ZEN | HPLC-FL | 2.5   | 8    | 74.9 - 88.4  | [128] |
|             | quercetin  | grafting on Fe <sub>3</sub> O <sub>4</sub>                  | wheat                                | ZEN | HPLC-FL | 0.55  | -    | 92.1 - 96.0  | [129] |

<sup>1</sup> HPLC-FL: fluorescence detection; HPLC-MS: mass spectrometric detection; HPLC-UV: ultraviolet detection. <sup>2</sup> ng/g or ng/mL

**Figure S1:** molecular structures of all the micotoxins considered in this paper

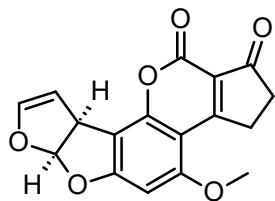

Aflatoxin B1, AFB1

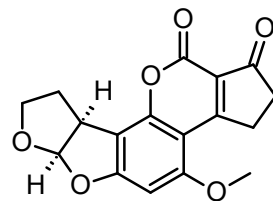

Aflatoxin B2, AFB2

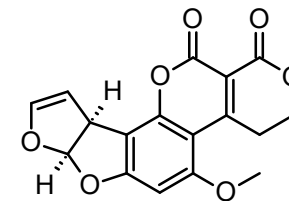

Aflatoxin G1, AFG1

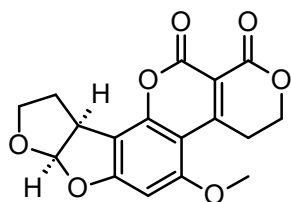

Aflatoxin G2, AFG2

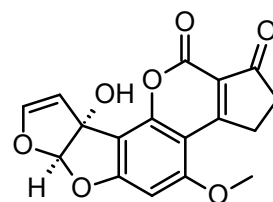

Aflatoxin M1, AFM1

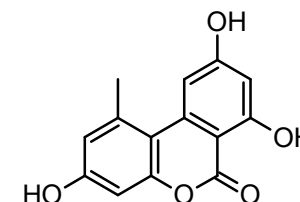

Alternariol, ALT

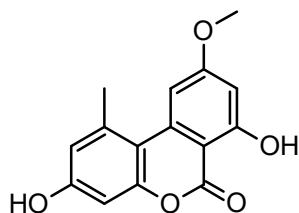

Alternariol 9-methylether, AME

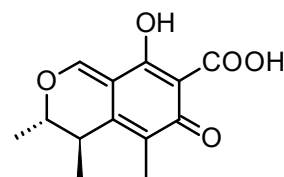

Citrinin, CIT

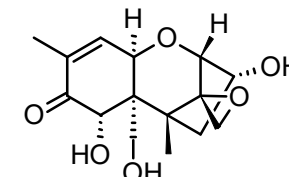

Deoxynivalenol, DON

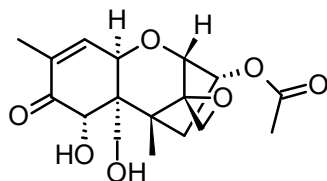

3-Acetyl-deoxynivalenol, 3-ADON

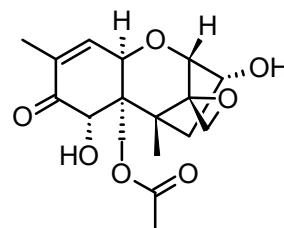

15-Acetyl-deoxynivalenol, 15-ADON

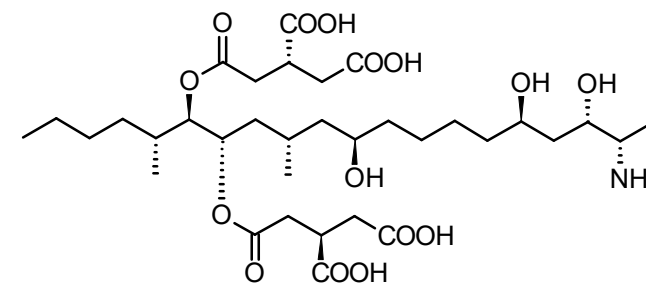

Fumonisin B1, FB1



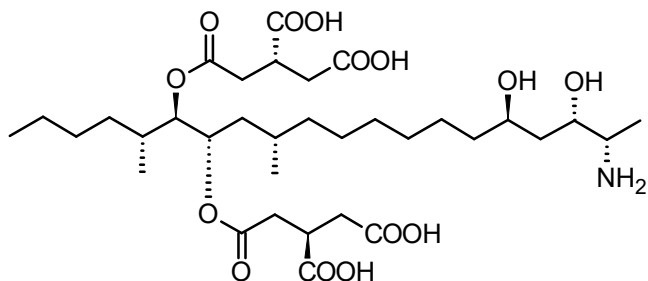

Fumonisin B2, FB2

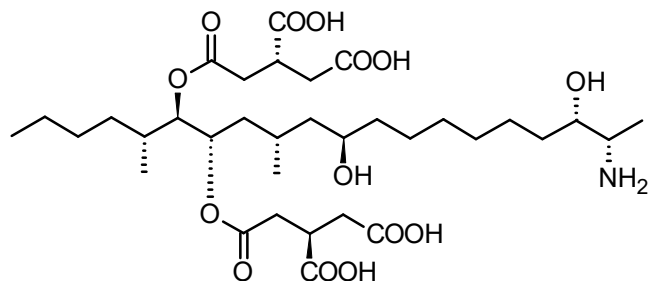

Fumonisin B3, FB3

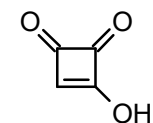

Moniliformin, MON

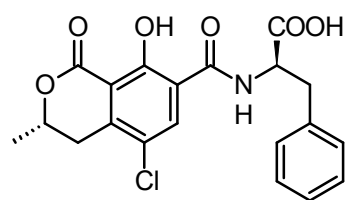

Ochratoxin A

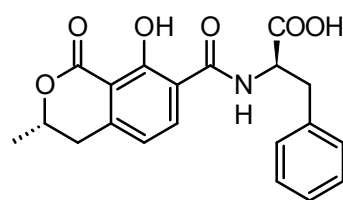

Ochratoxin B

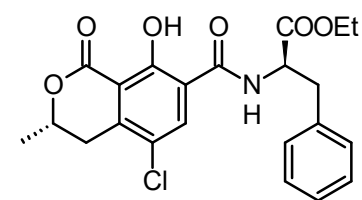

Ochratoxin C

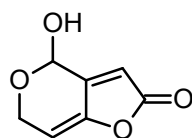

Patulin, PAT

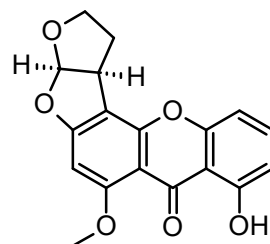

Sterigmatocystin, STE

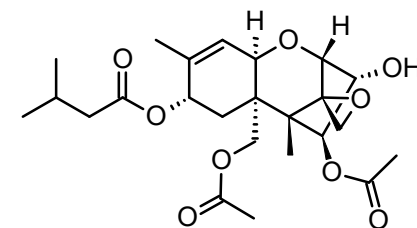

T-2 toxin, T2

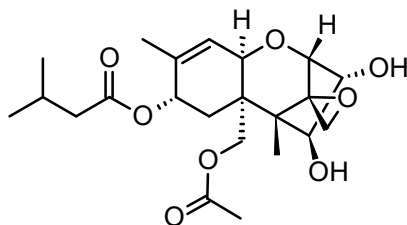

HT-2 toxin, HT2

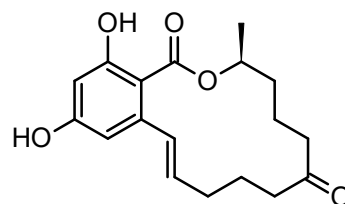

Zearalenone, ZON

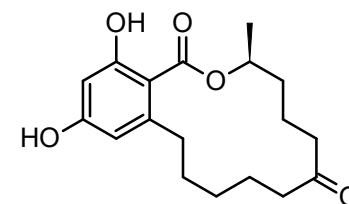

Zearalanone, ZAN
